# Supplementary material for: Hybrid BiOBr/UiO-66-NH2 composite with enhanced visible-light driven photocatalytic activity toward RhB dye degradation
Source: Royal Society of Chemistry journal article supplement (doi:10.1039/c7ra11500h), 2018-01-01
Supplement: c7ra11500h1.pdf [file c7ra11500h1.pdf]

## Supporting information

### **Hybrid BiOBr/UiO-66-NH<sub>2</sub> composite with enhanced visible-light driven photocatalytic activity toward RhB dye degradation.**

*Rehana Bibi<sup>a</sup>, Quanhao Shen<sup>a</sup>, Lingfei Wei<sup>a</sup>, dandan Hao<sup>a</sup>, Naixu Li<sup>a\*</sup>, Jiancheng Zhou<sup>a,b,c\*</sup>*

*<sup>a</sup>School of Chemistry and Chemical Engineering, Southeast University, Nanjing, 211189, P.R. China.*

*<sup>b</sup>Department of Chemical and Pharmaceutical Engineering, Southeast University, Chengxian College, Nanjing, 210088, P.R. China.*

*<sup>c</sup>Jiangsu Province Hi-Tech Key Laboratory for Bio-medical Research, Southeast University, Nanjing 211189, PR China.*

*\*Corresponding Author.*

*Tel: (+86) 025-52090621; fax: (+86) 025-52090620.*

*E-mail: jczhou@seu.edu.cn (Dr. Jiancheng Zhou)*

*Tel: +86 025 52090621; fax: +86 025 52090620*

*E-mail: naixuli@seu.edu.cn (Dr. Naixu Li)*

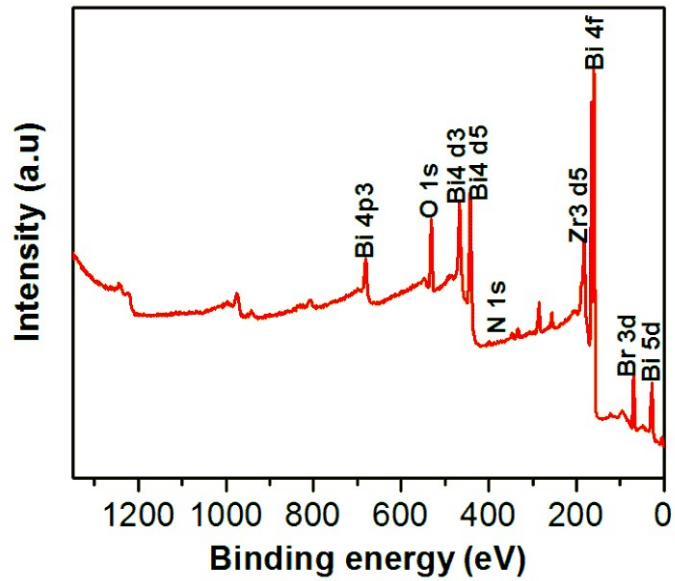

Figure.S1. Survey XPS Spectra of BUN-15.

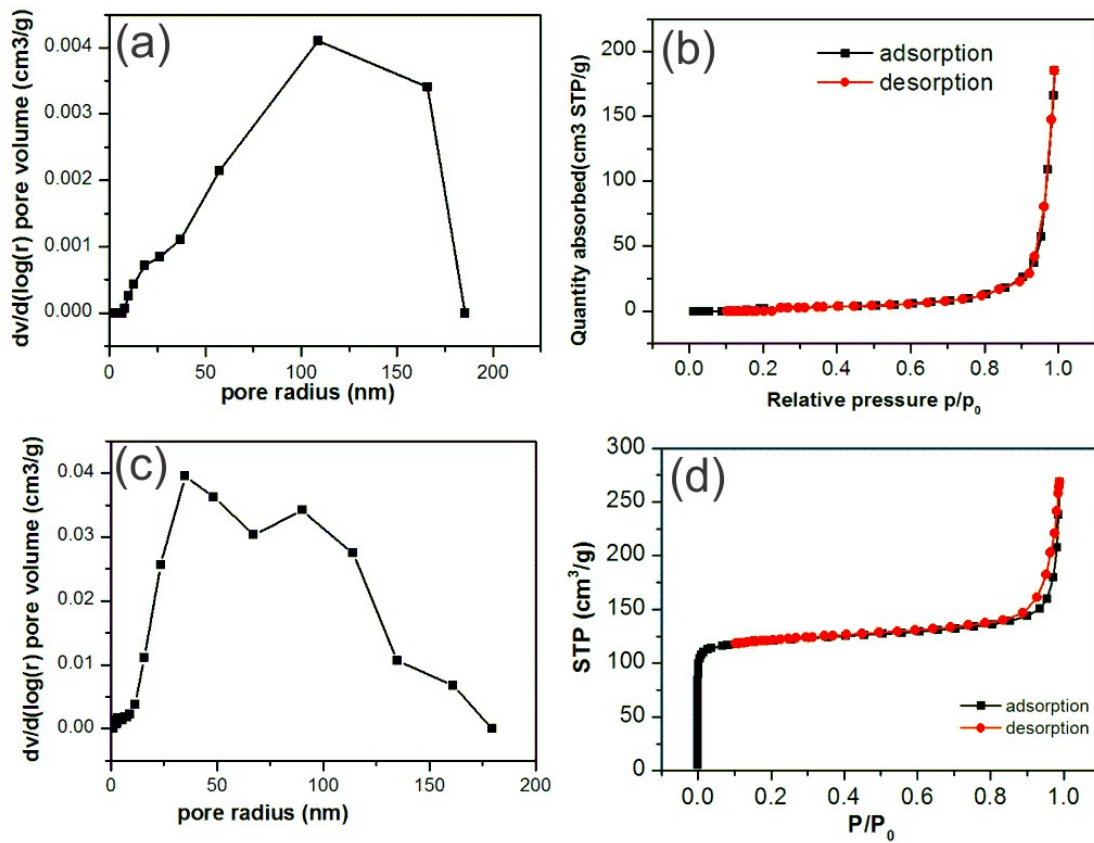

Figure.S2 (a)(b) pore size and surface area of BiOBr (c)(d) pore size and surface area of UiO-66-NH<sub>2</sub>.

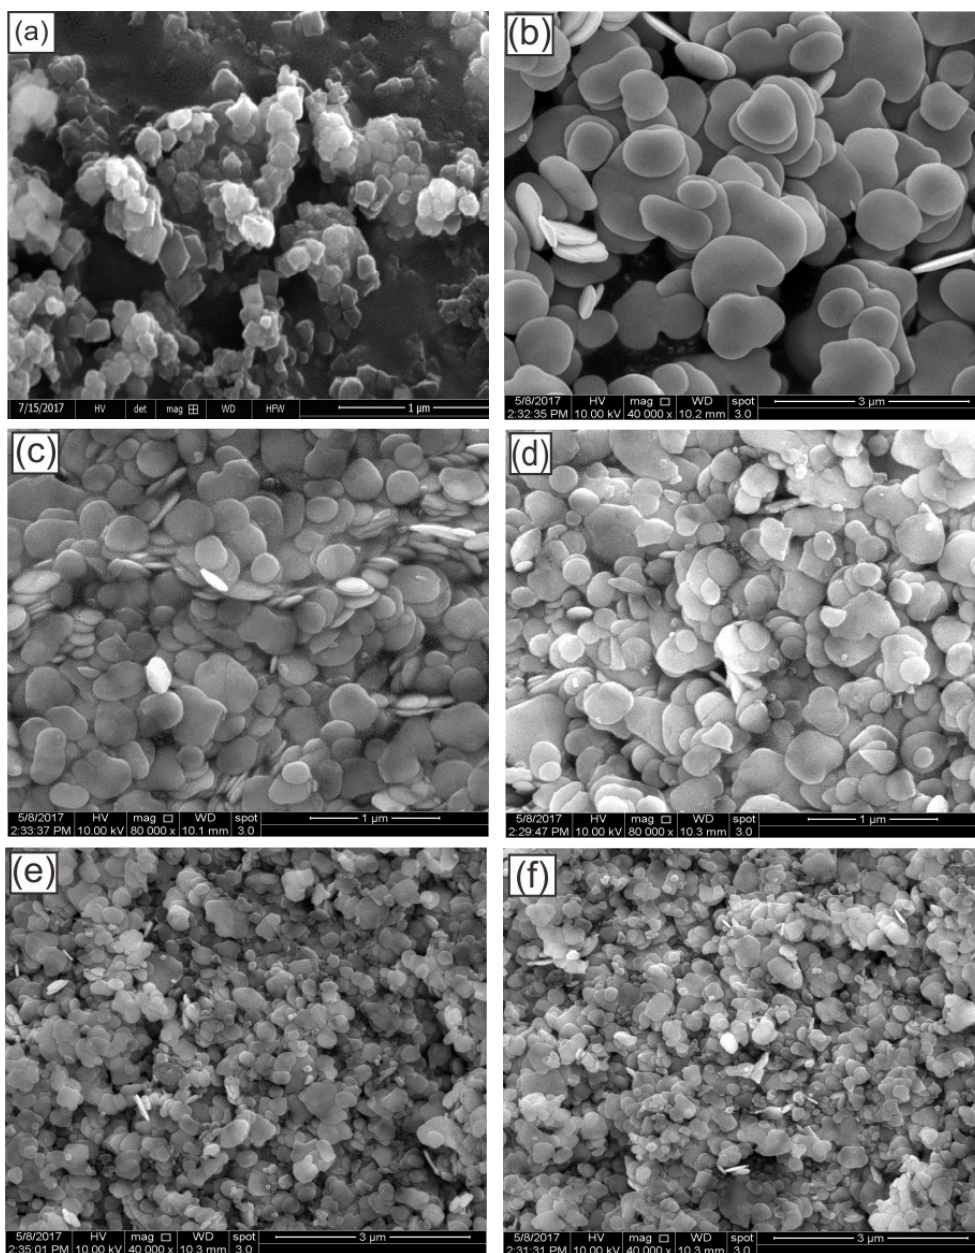

**Figure.S3.** SEM images of (a) UiO-66-NH<sub>2</sub> (b) BiOBr (c) BUN-3 (d) BUN-7 (e) BUN-10 (f) BUN-15.

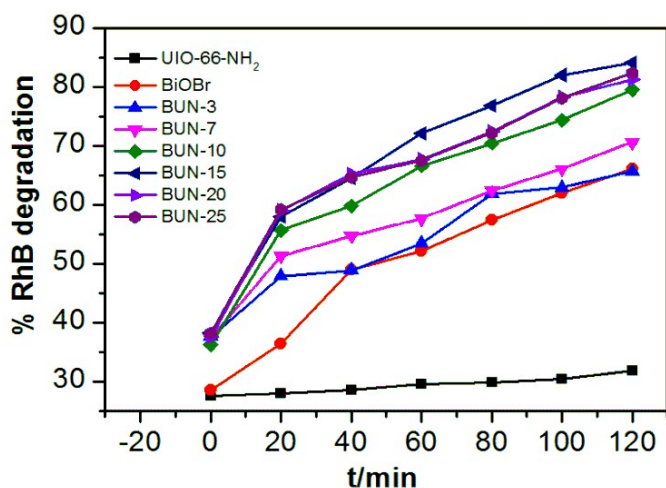

**Figure S5.** %age removal of RhB dye by photocatalytic degradation.

**Table S1.** Elements content of Composites by the ICP-MS analysis.

| Samples      |                | Wt % (ICP-MS) |      |
|--------------|----------------|---------------|------|
| Nominal mass | Calculated wt% | Bi            | Zr   |
| BUN-3        | 0.95           | 61.49         | 0.32 |
| BUN-7        | 2.24           | 58.27         | 1.21 |
| BUN-10       | 3.19           | 51.68         | 2.13 |
| BUN-15       | 4.79           | 47.34         | 3.12 |
| BUN-20       | 6.3            | 38.55         | 4.13 |
| BUN-25       | 7.9            | 32.54         | 4.53 |

**Table S2.** Metal ions detection after photocatalytic degradation in aqueous solution by ICP-MS analysis.

| Samples                | $\mu\text{g/L}$ |        |
|------------------------|-----------------|--------|
|                        | Zr              | Bi     |
| UiO-66-NH <sub>2</sub> | 0.29            | 0      |
| BUN-15                 | 0.051           | 113.03 |
